# Supplementary material for: Bioturbation as a key driver behind the dominance of Bacteria over Archaea in near-surface sediment
Source: PubMed Central journal article supplement (PMC5445093; doi:10.1038/s41598-017-02295-x), 2017-05-25
Supplement: 41598_2017_2295_MOESM1_ESM.pdf [file 41598_2017_2295_MOESM1_ESM.pdf]

1 **SUPPLEMENTARY INFORMATION**

2  
3  
4 **Bioturbation as a key driver behind the dominance of Bacteria over Archaea**  
5 **in near-surface sediment**  
6  
7

8 **Authors:** Xihan Chen <sup>1</sup>, Thorbjørn Joest Andersen <sup>2</sup>, Yuki Morono<sup>3</sup>, Fumio Inagaki<sup>3</sup>, Bo  
9 Barker Jørgensen <sup>1</sup>, Mark Alexander Lever\* <sup>1,4</sup>  
10

11 **Author affiliation:**

12 <sup>1</sup> Center for Geomicrobiology, Department of Bioscience, Aarhus University, 8000 Aarhus, Denmark

13 <sup>2</sup> Department of Geosciences and Natural Resource Management, University of Copenhagen, 1350  
14 Copenhagen, Denmark

15 <sup>3</sup> Kochi Institute for Core Sample Research, Japan Agency for Marine-Earth Science and Technology  
16 (JAMSTEC), Nankoku, Kochi 783-8502, Japan

17 <sup>4</sup> Institute for Biogeochemistry and Pollutant Dynamics, Department of Environmental Systems  
18 Sciences, ETH Zürich, 8092 Zürich, Switzerland

19  
20 **Correspondence:** mark.lever@usys.ethz.ch  
21

22 **Keywords:** 16S rRNA gene / Bacteria-to-Archaea Ratio / bioturbation / microbial community  
23 /quantitative PCR

## 24 **Supplementary Results**

### 25 **Method comparisons**

26 Our interpretations of archaeal and bacterial 16S gene abundance profiles assume that the  
27 DNA extraction and 16S gene amplification data reflect real trends within sediments rather  
28 than biases introduced by the DNA extraction method or primer choices. Using M1 sediment,  
29 we had previously shown good comparability in overall trends of archaeal and bacterial 16S  
30 gene abundances between our extraction method and a commercial DNA extraction kit  
31 (reference #6, Fig. 10c,d). We here additionally performed epifluorescence microscopic cell  
32 counts at M22A, M27A, M29A, M1, and M5 (Supplementary Fig. 7) and calculated gene  
33 copy numbers per cell by dividing the sum of archaeal and bacterial 16S gene abundances per  
34 sample by cell abundance data from the nearest sample in which cell numbers were  
35 quantified. These calculations enabled us to check whether calculated average gene copies  
36 per cell were in a realistic range. Published global mean±standard deviations of 16S gene  
37 copies per cell are  $4.12\pm 2.75$  for Bacteria and  $1.61\pm 0.88$  for Archaea  
38 (<https://rrndb.umms.med.umich.edu/>). Average values of 1-7 16S gene copies per cell would  
39 thus indicate good agreement between qPCR and cell count data. By contrast, values >7 16S  
40 gene copies per cell would suggest poor agreement, e.g. due to inclusion of high numbers of  
41 16S genes from outside of living cells or poor cell extraction and cell enumeration efficiency.  
42 Similarly, values of <1 16S gene copies per cell would indicate poor agreement, e.g. caused  
43 by low extraction efficiency of the DNA extraction method.

44 The cell abundance profiles match a previously proposed cell distribution model for  
45 marine sediments<sup>29</sup> (Supplementary Fig. 8a). Calculated 16S gene copies per cell mostly  
46 range between 1 and 5, suggesting a good match between 16S gene abundances and cell  
47 counts (Supplementary Fig. 8b; site averages±standard deviation: M22A:  $4.3\pm 4.2$ ; M27:  
48  $2.2\pm 1.4$ ; M29A:  $4.2\pm 2.5$ ; M5:  $2.0\pm 1.4$  copies cell<sup>-1</sup>). This good agreement is remarkable

49 given that cell and 16S gene abundances were quantified using independent extraction and  
50 quantification methods, and that DNA was extracted from different sediment aliquots and  
51 slightly different sediment depths than cells for cell counts. Noteworthy is also the absence of  
52 a clear, depth-related change in calculated 16S genes per cell, in spite of the shift from  
53 bacterial dominance in the bioturbation zone to similar population sizes of Bacteria and  
54 Archaea in deeper layers. This suggests that Bacteria and Archaea have similar numbers of  
55 16S genes per cell in surface and subsurface marine sediments of Aarhus Bay (also see  
56 Discussion).

57         We furthermore investigated the possibility that our domain-specific qPCR primer  
58 pairs introduced strong biases, which led to the observed trends in archaeal and bacterial  
59 distributions (info on primer combinations in Supplementary Methods). Indeed, while  
60 agreement was good in bioturbated surface sediments, we observed significant, primer-  
61 dependent differences in archaeal 16S gene abundance estimates in subsurface sediments,  
62 with our archaeal primer choice resulting in higher estimates than two other archaeal primer  
63 combinations (Supplementary Fig. 6a). By contrast, bacterial 16S gene abundances estimated  
64 using three different bacterial primer pairs showed a better agreement (Supplementary Fig.  
65 6b). Despite these primer-related differences, the overwhelming dominance of bacterial over  
66 archaeal 16S genes in surface sediments, and the comparable 16S gene abundances of the two  
67 domains in subsurface sediments were confirmed (Supplementary Fig. 6c).

68

69

## 70 **Supplementary Methods**

### 71 **Additional Primer Checks**

72 We performed additional qPCR assays to compare gene copy numbers obtained with three  
73 different archaeal and three different bacterial qPCR primer combinations on five sediment

74 depths from station M1 (5, 80, 160, 310 and 1055 cmbsf). At each sediment depth we  
75 performed three replicate DNA extractions. In addition, we ran three replicate qPCR assays  
76 on each individual extract. The three archaeal primer pairs used were: (1) Arc806F-Arc958R  
77 (described in the Methods), (2) Arc806F-Arc915Rmod (5'-GTG CTC CCC CGC CAA TT-  
78 3')<sup>3</sup>, and (3) Arc915Fmod (5'-AAT TGG CGG GGG AGC AC -3')<sup>3</sup> - Arc1059R (5'-GCC  
79 ATG CAC CWC CTC T-3')<sup>4</sup>. The three bacterial primer pairs were: (1) Bac8Fmod-  
80 Bac338Rabc (described in the Methods), (2) Bac806F\_mod2 (5'-AAC RGG ATT AGA TAC  
81 CCT GGT AGT CC-3')<sup>5</sup> - Bac908R\_mod (5'- CCC GTC AAT TCM TTT GAG TT-3')<sup>6</sup>, and  
82 (3) Bac908F\_mod (5'-AAC TCA AAK GAA TTG ACG GG-3')<sup>6</sup> - Bac1075R (5'-CAC GAG  
83 CTG ACG ACA RCC-3')<sup>7</sup>. The thermal cycler protocols were the same as described in the  
84 Methods, except that an annealing temperature of 56°C was used for all bacterial assays, and  
85 an elongation time of 15s was used for all archaeal assays.

86

### 87 **Core descriptions (2012)**

88 Ten Rumohr cores were taken each from M1 and from M5 in March 2012 and described  
89 based on sediment color changes and distributions of burrows. All of these cores showed  
90 visual signs of an oxidized surface mixed layer (SML), where sediments had a predominantly  
91 light brown color. This layer was typically 4±1 cm thick. Below this SML, sediments became  
92 predominantly dark grey, presumably due to the accumulation of iron(II) sulfides, while  
93 locally still containing light brown streaks, that indicated occasional transport of oxidized  
94 surface sediments to deeper layers by macrofauna. This deep mixed layer (DML) extended  
95 from approximately 4 to 10 cmbsf at station M1. At M5, the DML was more variable in  
96 depth, ranging from ~4-12 cm in the microbiology core, and from ~4 to 7 to ~4 to 20 cmbsf  
97 in the other nine cores. All Rumohr cores had worm burrows. These burrows ranged down to  
98 22 cmbsf and 17 cmbsf in the microbiology cores from M1 and M5, respectively. In the other

99 cores, the burrows ranged down to 15 to 27 cmbsf at M1, and to 14 to 40 cmbsf at M5. Deep-  
100 ranging burrows were typically ~1 cm in diameter, ranged in direction from sloping to nearly  
101 horizontal, and had rough-textured inner walls with no lining and no signs of oxidation.  
102 Macrofauna were observed in two cores: one worm (*Heteromastus filiformis*) was present at  
103 10 cm sediment depth in the core from M1; this core was also used for methane, DIC, and  
104 TOC analyses. Furthermore, one small specimen of *Echinocardium cordatum* (diameter ~0.5  
105 cm) was found in surface sediment of the microbiology core from M5. Below the DML,  
106 sediments remained dark grey until a second color change, from dark grey back to a lighter  
107 brown, occurred further below. The depth of this color transition was highly variable,  
108 occurring between 28-48 cmbsf at M1, and between 35-57 cmbsf at M5, and correlates with a  
109 strong decrease in microbial sulfate reduction rates between 30 and 50 cmbsf at M1<sup>1, 2</sup>, and  
110 roughly with the depth of the SMTZ at M5. This deep color transition could be due to  
111 decreased sulfate reduction rates and consequentially lower accumulation of iron(II) sulfides  
112 in layers below the transition.

113         The sediment cores from Aarhus Harbor differed markedly from the Aarhus Bay  
114 stations in that macrofauna or any signs of macrofaunal activity were absent. Sediments were  
115 uniformly black below the top ~1 mm, presumably due to high rates of sulfate reduction and  
116 metal sulfide precipitation.

117

### 118 **Archaeal and bacterial community compositions at M1**

119 The same DNA extracts from five depths at M1 and the same archaeal and bacteria primer  
120 pairs as described above were used for PCR followed by DNA sequencing. Each 50- $\mu$ L PCR  
121 reaction mixture (1<sup>st</sup> PCR) contained 25  $\mu$ l 2 $\times$  KAPA HiFi HotStart ReadyMix (Kapa  
122 Biosystems), 0.4  $\mu$ M of each primer, and 1  $\mu$ L DNA template. The thermal cycler protocols  
123 were (1) enzyme activation and initial denaturation at 95°C for 5 min; (2) 15 cycles of (a)

124 denaturation at 98°C for 20 sec, (b) primer annealing at 56°C (A1 and A2) and 60°C (A3, B1,  
125 B2 and B3) for 30 sec, and (c) elongation at 72°C for 15 sec; (3) final extension at 72°C for 5  
126 min. PCR products were visualized using gel electrophoresis and cleaned using the  
127 Agencourt Ampure XP kit (Beckman Coulter, Brea CA). Cleaned PCR products were  
128 subjected to a second PCR amplification with barcoded PCR primers (8 bp barcode) in  
129 preparation for multiplex amplicon sequencing on an Ion Personal Genome Machine (PGM™)  
130 system (Ion Torrent, Life Technologies). PCR protocols with barcode-tagged primers were  
131 the same as for the first PCR, except that the 1<sup>st</sup> PCR product was used as a DNA template,  
132 the annealing temperature was 5°C higher, and 27 thermal cycles were used. The barcoded  
133 PCR products were visualized using gel electrophoresis and cleaned using the Agencourt  
134 Ampure XP kit as for the 1<sup>st</sup> PCR products. Cleaned PCR products were quantified using the  
135 Qubit hs-DS-DNA kit (Invitrogen) on a Qubit® 2.0 Fluorometer (Invitrogen, Life  
136 Technologies) reading at 485 nm excitation and 530 nm emission, pooled at equimolar  
137 concentrations of each barcoded PCR product, and sequenced using an Ion PGM™ system  
138 with one 314 chip and one 316 chip.

139 Sequence de-multiplexing and bioinformatic processing were performed using Mothur  
140 pipelines<sup>8</sup>. Sequences were analyzed individually for each primer pair, since the amplicons  
141 covered different regions. Initial quality filtering excluded all sequences that were shorter  
142 than 100 bp or contained primer mismatches, homopolymer runs >8 bp, or a mean quality  
143 score below 20. Acacia was used to correct amplicon pyrosequencing errors<sup>9</sup>. Uchime was  
144 used to detect chimeric sequences<sup>10</sup>, which were removed before OTU classification. The  
145 high quality sequences were then clustered using an average neighbor algorithm at a 97%  
146 sequence similarity cutoff. OTUs with singleton reads were filtered and dropped before  
147 further analysis. OTUs were given taxonomic assignments based on full-length sequences  
148 and taxonomy references from Silva Release 119

149 ([http://www.mothur.org/wiki/Silva\\_reference\\_files](http://www.mothur.org/wiki/Silva_reference_files)). For each primer pair, the libraries  
150 generated for each of the three DNA extracts per sediment depth were used to calculate  
151 average percentages of each taxonomic group, which were then used in all analyses on  
152 archaeal and bacterial community structure.

153 To compare the community compositions across the different primer pairs and depths  
154 analyzed, pairwise sample similarities (Bray Curtis) of archaeal and bacterial sequences were  
155 calculated at the species level and visualized using Unweighted Pair Group Method with  
156 Arithmetic Mean (UPGMA) trees by software PAST<sup>11</sup>.

157

## Supplementary Tables

**Supplementary Table 1: Basic information on sampling stations.** mbsf, meters below seafloor; SMTZ = sulfate-methane transition zone, defined as the depth interval where the concentration ratio of sulfate to methane ranges from 2:1 to 1:2, and where the highest rates of anaerobic oxidation of methane occur; N/A = not applicable, because this depth was not reached in the cored interval, ND = not determined.

| Station     | Location                 | Water Depth (m) | Sampling Time | Core length (mbsf) | Depth interval of SMTZ (mbsf) | Depth of free CH <sub>4</sub> gas (mbsf) |
|-------------|--------------------------|-----------------|---------------|--------------------|-------------------------------|------------------------------------------|
| <b>M21</b>  | 56°06.810'N, 10°24.714'E | 18.4            | Oct. 2009     | 2.97               | N/A                           | N/A                                      |
| <b>M22A</b> | 56°06.745'N, 10°24.880'E | 18.8            | May 2010      | 4.82               | N/A                           | N/A                                      |
| <b>M24</b>  | 56°06.713'N, 10°24.981'E | 18.8            | Oct. 2009     | 5.80               | 3.36-4.31                     | N/A                                      |
| <b>M26</b>  | 56°06.693'N, 10°25.029'E | 19.1            | Oct. 2009     | 5.54               | 3.04-3.78                     | 7.04                                     |
| <b>M27A</b> | 56°06.679'N, 10°25.083'E | 19.1            | May 2010      | 7.12               | 2.62-2.90                     | 4.70                                     |
| <b>M29A</b> | 56°06.645'N, 10°25.175'E | 19.3            | May 2010      | 7.20               | 2.20-2.75                     | 4.45                                     |
| <b>M1</b>   | 56°09.167'N, 10°19.333'E | 15.0            | Oct. 2009     | 10.85              | 1.40-1.60                     | 4.00                                     |
|             |                          |                 | May 2010      | 9.20               | 1.94-2.03                     | ND                                       |
|             |                          |                 | March 2012    | 0.62               | N/A                           | N/A                                      |
| <b>M5</b>   | 56°06.333'N, 10°27.800'E | 27.0            | May 2010      | 6.70               | 0.47-0.58                     | 1.00                                     |
|             |                          |                 | March 2012    | 0.81               | 0.48-0.56                     | N/A                                      |
| <b>AHB</b>  | 56°08.324'N, 10°12.877'E | ~2.0            | July 2012     | 0.15               | N/A                           | N/A                                      |



**Supplementary Table 2: Summary of average bacterial and archaeal 16S gene abundances and BARs across 8 stations and 4 biogeochemical zones.** Archaeal and bacterial 16S gene copy numbers are shown in units of  $10^8$  copies  $\text{cm}^{-3}$  of wet sediment.

| Zones<br>Stations |          | Bioturbation zone |             |          | Sulfate zone |            |          | SMTZ      |           |          | Methane zone |           |          |
|-------------------|----------|-------------------|-------------|----------|--------------|------------|----------|-----------|-----------|----------|--------------|-----------|----------|
|                   |          | mean±std.         | range       | <i>n</i> | mean±std.    | range      | <i>n</i> | mean±std. | range     | <i>n</i> | mean±std.    | range     | <i>n</i> |
| M21               | Archaea  | 1.44±0.89         | 0.21-2.30   | 3        | 1.82±1.67    | 0.23-4.57  | 4        | 0.27      | 0.06      | 2        | /            | /         | 0        |
|                   | Bacteria | 19.68±4.73        | 13.10-24.01 |          | 3.23±2.95    | 0.10-7.73  |          | 0.09      | 0.00      |          | /            | /         |          |
|                   | BAR      | 28.33±24.13       | 10.42-62.43 |          | 1.48±0.70    | 0.43-2.37  |          | 0.33      | 0.06      |          | /            | /         |          |
| M22A              | Archaea  | 1.30±0.72         | 0.58-2.02   | 2        | 2.12±1.75    | 0.25-4.95  | 5        | 0.73      | 0.73      | 1        | /            | /         | 0        |
|                   | Bacteria | 18.59±1.43        | 17.16-20.02 |          | 4.32±3.54    | 0.38-9.86  |          | 0.61      | 0.61      |          | /            | /         |          |
|                   | BAR      | 21.52±13.01       | 8.52-34.53  |          | 1.97±0.33    | 1.35-2.24  |          | 0.84      | 0.84      |          | /            | /         |          |
| M24               | Archaea  | 2.30±1.34         | 0.91-4.10   | 3        | 1.80±1.30    | 0.32-3.40  | 4        | 0.13±0.03 | 0.10-0.16 | 3        | 0.16±0.02    | 0.14-0.18 | 2        |
|                   | Bacteria | 30.87±5.78        | 24.70-38.61 |          | 4.07±3.30    | 0.58-7.55  |          | 0.15±0.02 | 0.12-0.17 |          | 0.11±0.00    | 0.11-0.12 |          |
|                   | BAR      | 21.30±15.40       | 6.02-42.37  |          | 2.00±0.54    | 1.30-2.78  |          | 1.16±0.09 | 1.05-1.25 |          | 0.71±0.12    | 0.59-0.84 |          |
| M26               | Archaea  | 0.78±0.21         | 0.55-1.05   | 3        | 1.77±1.46    | 0.40-4.12  | 4        | 0.63±0.23 | 0.34-0.91 | 3        | 0.36±0.10    | 0.28-0.50 | 3        |
|                   | Bacteria | 35.79±11.70       | 25.35-52.13 |          | 3.47±2.78    | 0.62-8.05  |          | 0.49±0.16 | 0.28-0.66 |          | 0.26±0.08    | 0.19-0.37 |          |
|                   | BAR      | 46.17±8.14        | 34.95-53.99 |          | 2.23±1.17    | 1.20-4.20  |          | 0.78±0.04 | 0.73-0.80 |          | 0.71±0.06    | 0.62-0.78 |          |
| M27A              | Archaea  | 2.09±0.96         | 1.14-3.05   | 2        | 2.51±1.93    | 0.13-4.30  | 5        | 0.41±0.22 | 0.22-0.72 | 3        | 0.19±0.04    | 0.14-0.23 | 4        |
|                   | Bacteria | 26.44±4.81        | 21.63-31.25 |          | 5.52±4.71    | 0.38-13.00 |          | 0.57±0.12 | 0.45-0.73 |          | 0.18±0.10    | 0.07-0.32 |          |
|                   | BAR      | 17.30±10.21       | 7.09-27.50  |          | 2.53±0.88    | 1.66-4.00  |          | 1.63±0.53 | 1.02-2.32 |          | 0.86±0.36    | 0.50-1.43 |          |
| M29A              | Archaea  | 3.04±2.09         | 0.95-5.13   | 2        | 3.29±2.66    | 0.10-6.81  | 5        | 0.59±0.33 | 0.27-1.05 | 3        | 0.48±0.24    | 0.24-0.87 | 4        |
|                   | Bacteria | 36.80±7.59        | 29.21-44.39 |          | 6.40±4.91    | 0.29-12.31 |          | 0.77±0.06 | 0.71-0.86 |          | 0.52±0.17    | 0.25-0.70 |          |
|                   | BAR      | 26.24±20.55       | 5.70-46.79  |          | 2.35±0.52    | 1.81-2.98  |          | 1.72±0.80 | 0.82-2.76 |          | 1.22±0.49    | 0.71-2.02 |          |
| M1(2009)          | Archaea  | 0.89±0.13         | 0.77-1.02   | 2        | 2.89±0.63    | 2.04-3.75  | 4        | 3.11±1.76 | 1.18-5.43 | 3        | 1.40±0.21    | 1.23-1.76 | 4        |
|                   | Bacteria | 43.84±6.85        | 36.99-50.70 |          | 5.11±2.36    | 5.41-34.43 |          | 3.01±1.85 | 1.39-5.59 |          | 1.06±0.27    | 0.80-1.46 |          |
|                   | BAR      | 51.17±14.98       | 36.19-66.15 |          | 1.78±0.69    | 0.94-2.53  |          | 0.99±0.18 | 0.75-1.18 |          | 0.78±0.27    | 0.46-1.19 |          |

| Zones           |                 | Bioturbation zone |            |          | Sulfate zone |            |          | SMTZ      |            |          | Methane zone |           |          |
|-----------------|-----------------|-------------------|------------|----------|--------------|------------|----------|-----------|------------|----------|--------------|-----------|----------|
|                 |                 | mean±std.         | range      | <i>n</i> | mean±std.    | range      | <i>n</i> | mean±std. | range      | <i>n</i> | mean±std.    | range     | <i>n</i> |
| <b>M5(2010)</b> | <b>Archaea</b>  | /                 | /          | 0        | 1.25±1.13    | 0.37-2.84  | 3        | 1.46±0.12 | 1.37-1.64  | 3        | 0.83±0.51    | 0.24-1.48 | 3        |
|                 | <b>Bacteria</b> | /                 | /          |          | 3.81±3.71    | 1.15-9.05  |          | 6.01±2.71 | 3.42-9.75  |          | 2.56±1.79    | 0.42-4.80 |          |
|                 | <b>BAR</b>      | /                 | /          |          | 2.85±2.49    | 2.22-3.19  |          | 4.23±5.30 | 2.09-7.06  |          | 2.74±0.71    | 1.74-3.26 |          |
| <b>M1(2012)</b> | <b>Archaea</b>  | 2.72±0.58         | 1.98-3.64  | 7        | 3.05±1.12    | 1.41-5.52  | 12       | /         | /          | 0        | /            | /         | 0        |
|                 | <b>Bacteria</b> | 25.22±17.55       | 6.25-56.81 |          | 5.97±2.01    | 4.01-11.60 |          | /         | /          |          | /            | /         |          |
|                 | <b>BAR</b>      | 8.90±6.18         | 2.65-21.92 |          | 2.08±0.56    | 1.33-2.95  |          | /         | /          |          | /            | /         |          |
| <b>M5(2012)</b> | <b>Archaea</b>  | 2.57±0.77         | 1.32-3.52  | 7        | 3.63±1.07    | 1.95-5.30  | 9        | 3.41±1.83 | 1.65-5.93  | 3        | 3.55±1.22    | 2.27-5.58 | 5        |
|                 | <b>Bacteria</b> | 18.05±12.00       | 7.80-44.97 |          | 8.00±1.92    | 4.73-10.44 |          | 6.34±3.25 | 3.08-10.77 |          | 4.94±1.35    | 3.67-6.98 |          |
|                 | <b>BAR</b>      | 7.81±5.31         | 2.71-16.39 |          | 2.27±0.32    | 1.76-2.78  |          | 1.88±0.06 | 1.82-1.95  |          | 1.43±0.14    | 1.25-1.63 |          |
| <b>Overall</b>  | <b>Archaea</b>  | 2.10±1.18         | 0.21-5.13  | 31       | 2.65±1.68    | 0.10-6.81  | 55       | 1.27±1.51 | 0.10-5.93  | 24       | 1.20±1.37    | 0.14-5.58 | 25       |
|                 | <b>Bacteria</b> | 26.24±13.80       | 6.25-56.81 |          | 5.54±3.50    | 0.10-13.00 |          | 2.20±2.94 | 0.08-10.77 |          | 1.61±2.01    | 0.07-6.98 |          |
|                 | <b>BAR</b>      | 20.54±18.97       | 2.65-66.15 |          | 2.15±0.70    | 0.43-4.20  |          | 1.61±1.36 | 0.28-7.06  |          | 1.21±0.72    | 0.46-3.26 |          |

**Supplementary Table 3: List of the dominant sediment macrofauna and their size, burial depth and feeding mode in central Aarhus Bay.**

| Type        | Species                                        | Adult size (cm)        | Burial depth                                      | Feeding mode and depth                                                                           | References |
|-------------|------------------------------------------------|------------------------|---------------------------------------------------|--------------------------------------------------------------------------------------------------|------------|
| Bivalves    | <i>Abra alba</i>                               | 2.5                    | 0.5-2.5 cm*                                       | Mainly surface deposit feeder, but also suspension feeder                                        | 12, 13     |
|             | <i>Mysella bidentata</i>                       | 0.3                    | Surface, burrows of other species, crevices       | Surface deposit and suspension feeder; mainly deposit feeder in Aarhus Bay                       | 14-17      |
|             | <i>Corbula gibba</i>                           | 1.5                    | 1-2 cm                                            | Surface suspension feeder                                                                        | 18, 19     |
|             | <i>Macoma calcarea</i>                         | 3.5-5                  | 0-10 cm                                           | Surface deposit feeder, suspension feeder                                                        | 20         |
| Polychaetes | <i>Terebellides stroemi</i>                    | 7.5                    | Tube extends to several cm below sediment surface | Sedentary surface deposit feeder that builds a tube, preference for small, low-gravity particles | 21         |
|             | <i>Nephtys ciliate</i> ,<br><i>Nephtys</i> sp. | 10-30                  | Commonly to 5-10 cm, but also deeper              | Predator, scavenger, deposit feeder; builds temporary burrows; biodiffusor                       | 22-24      |
|             | <i>Heteromastus filiformis</i>                 | Length: 10, width: 0.1 | 0-30 cm                                           | Subsurface deposit feeder with upward conveyor belt transport, builds burrows                    | 13, 14, 21 |
|             | <i>Pectinaria</i> sp.                          | 4.5                    | Tubes extend to 5 cm depth                        | (Mainly subsurface) deposit feeder with upward conveyor belt transport, builds tube              | 14, 25     |
| Echinoderms | <i>Ophiura albida</i>                          | Disc: 1.5, arms: 6     | Stays at surface                                  | Surface predator, scavenger, deposit feeder                                                      | 15         |
|             | <i>Echinocardium cordatum</i>                  | 5                      | 0-15 cm                                           | Surface deposit feeder, surface to subsurface burrower                                           | 26         |

\*inferred from close relative *Abra nitida*

## Supplementary Figures

**Supplementary Figure 1: Map of Aarhus Bay, Denmark, with locations of sampling stations (modified from reference #27). The gray shades indicate the shallowest depth at which free gas bubbles appear.**

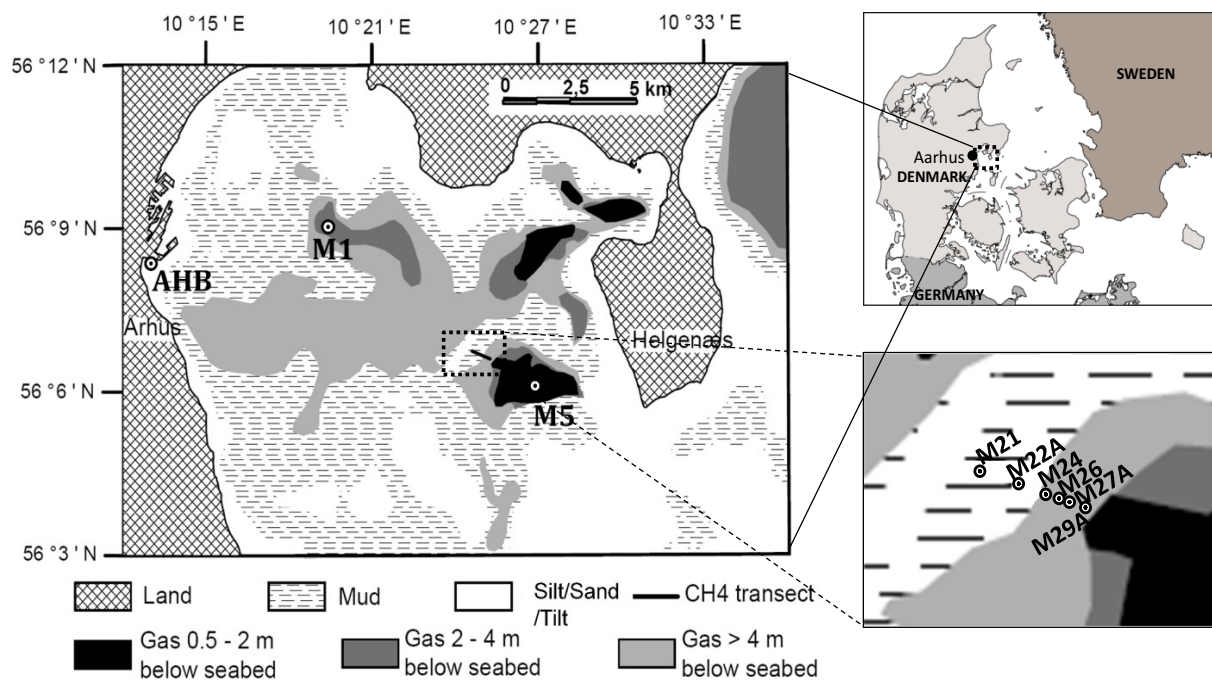

**Supplementary Figure 2: Depth distributions of archaeal and bacterial 16S gene abundances across the CH<sub>4</sub> transect in Aarhus Bay (M21-M29A), and at Stations M1 and M5.** The lower figures show data from the upper figures at high resolution for the top 0.5 m. Grey shaded areas mark the depth interval of the SMTZ (also see Supplementary Table 1). Sediments above belong to the sulfate zone (SZ), sediments below belong to the methane zone (MZ; also see labeling in figure for M24). The gray circle at M21 indicates samples from an organic-poor glacial sand layer at the bottom of M21. The SMTZ and MZ were not reached by coring at M21 and M22A.

Supplementary Figure 2

Archaea & Bacteria (gene copies cm<sup>-3</sup>)

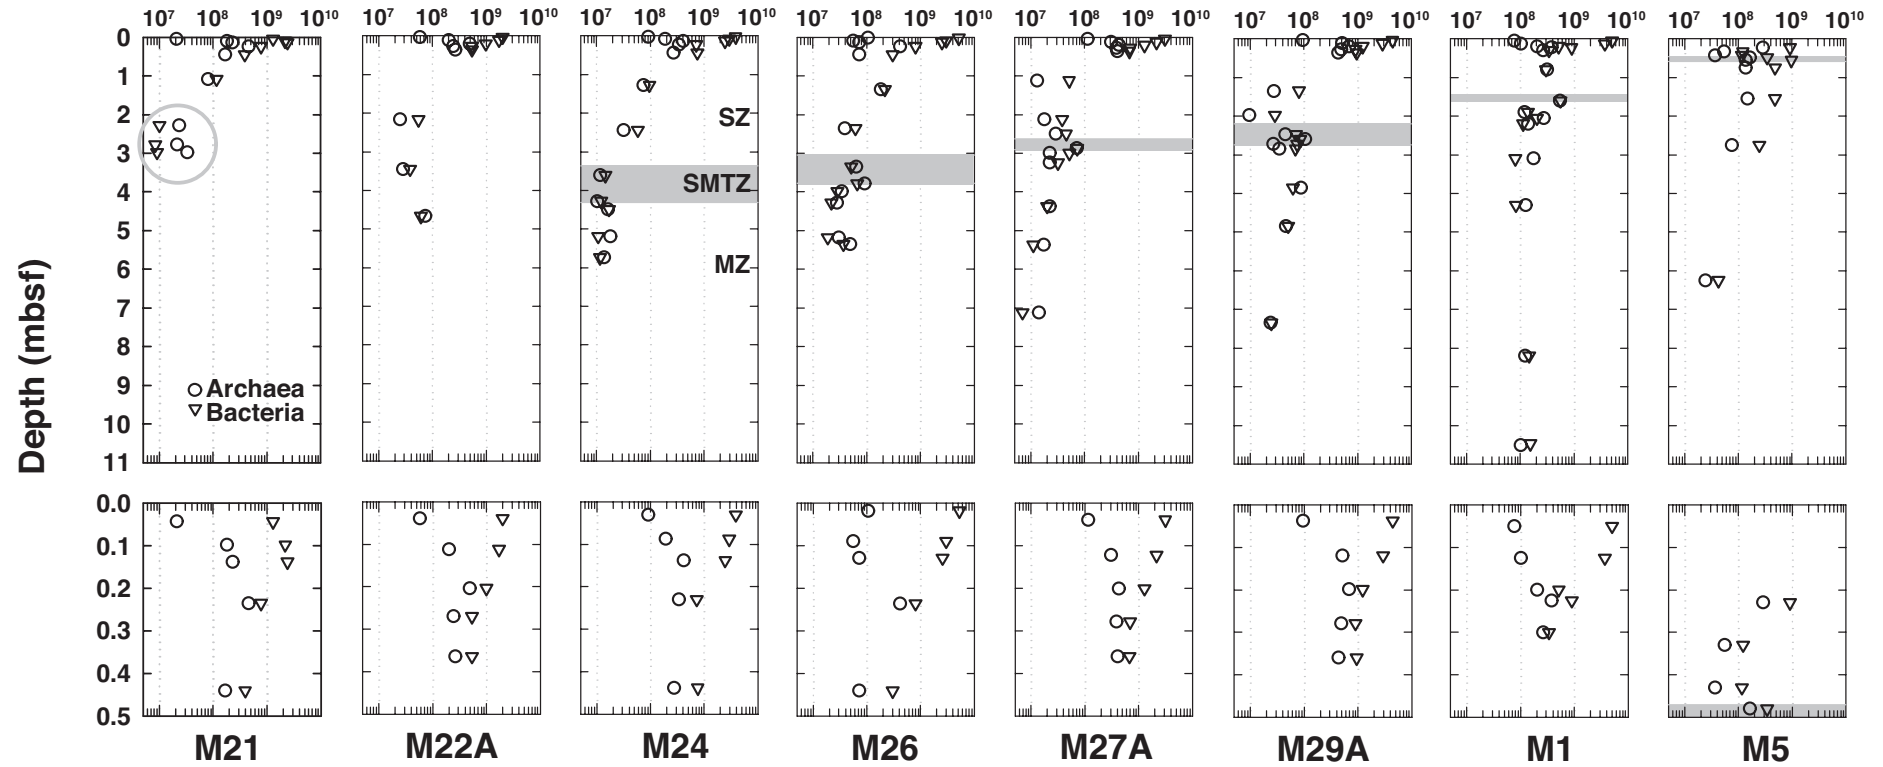

**Supplementary Figure 3: Fine-scale geochemical profiles at Stations M1 (top) and M5 (bottom).** (a, b) methane concentrations; (c, d) total organic carbon (TOC) in weight % (wt%); (e, f) porosity; (g, h) density. The horizontal grey dashed line spanning all panels marks the depth to which significant sediment reworking was detected (0.14 mbsf). The grey zone at M5 marks the SMTZ. All data were obtained from Rumohr cores collected in March 2012.

# Supplementary Figure 3

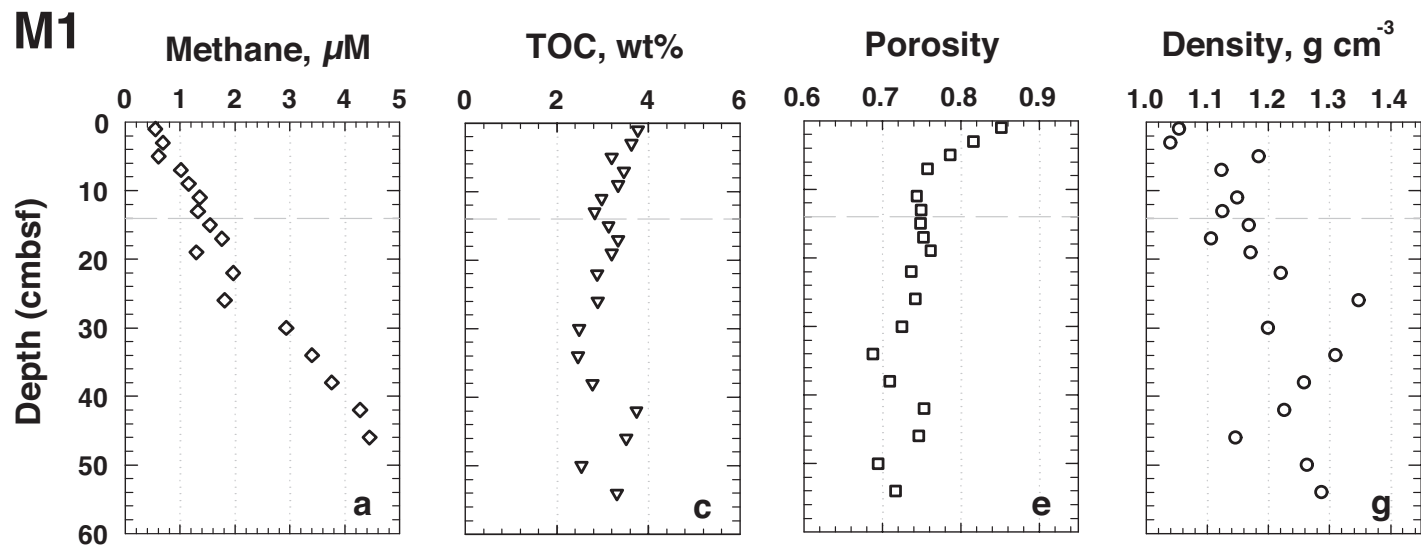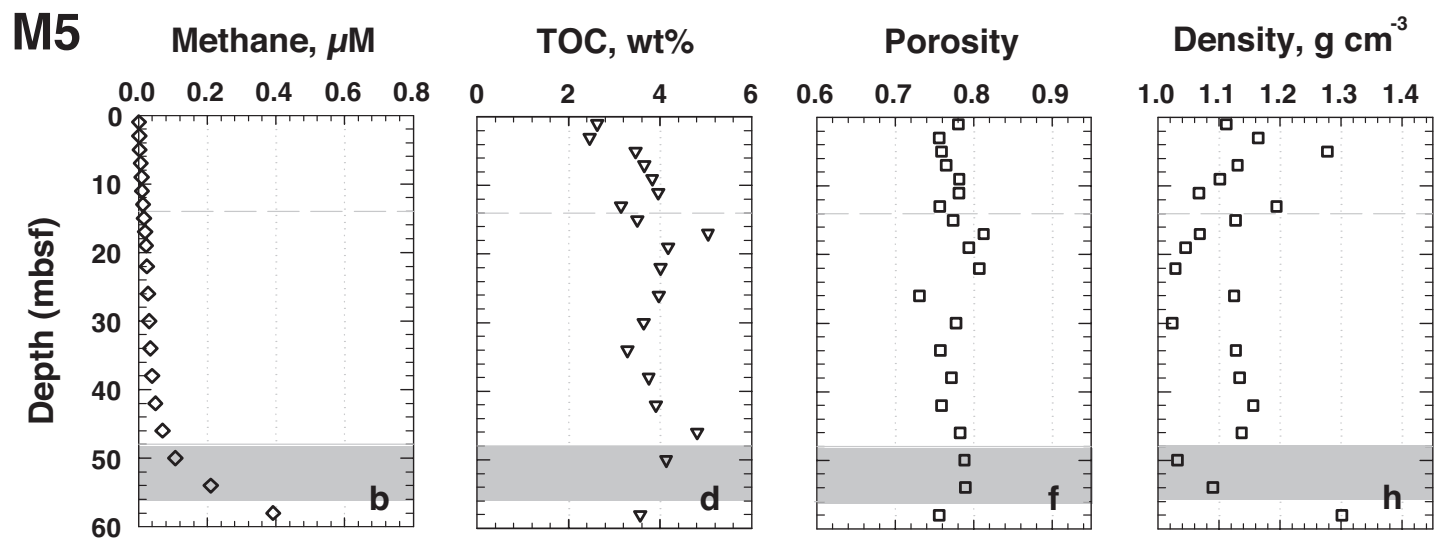



Supplementary Figure 4: (a) Archaeal and bacterial 16S gene abundances, and (b) BARs in surface sediment at the bioturbation-free control site in Aarhus Harbor (AHB) compared to stations in Aarhus Bay.

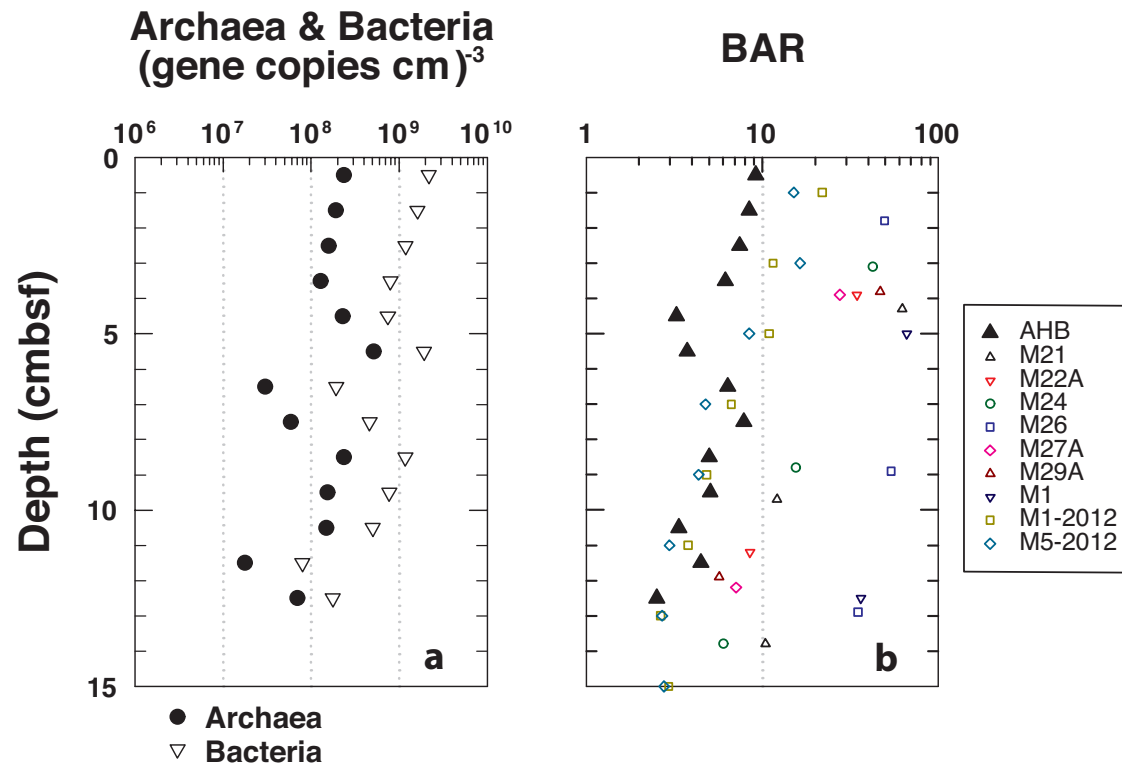

**Supplementary Figure 5: Scatter plots illustrating the relationships between TOC, TN, C:N,  $\delta^{13}\text{C}$ -TOC, and  $\delta^{15}\text{N}$ -TN and BAR, archaeal 16S gene abundances, and bacterial 16S gene abundances. (a) Samples spanning the bioturbation zone; (b) samples spanning sediments underlying the bioturbation zone; (c) samples spanning sediments underlying the bioturbation zone excluding all terrestrial samples.  $R^2$ -values are for the trendline shown in each plot. Statistical significance of the correlations was determined using a Spearman's Rank Correlation test (ns = not significant; asterisks indicate statistical significance with the number of asterisks indicating the level of significance: \* for  $p < 0.05$ , \*\* for  $p < 0.01$ , and \*\*\* for  $p < 0.001$ ).**

Supplementary Fig 5a

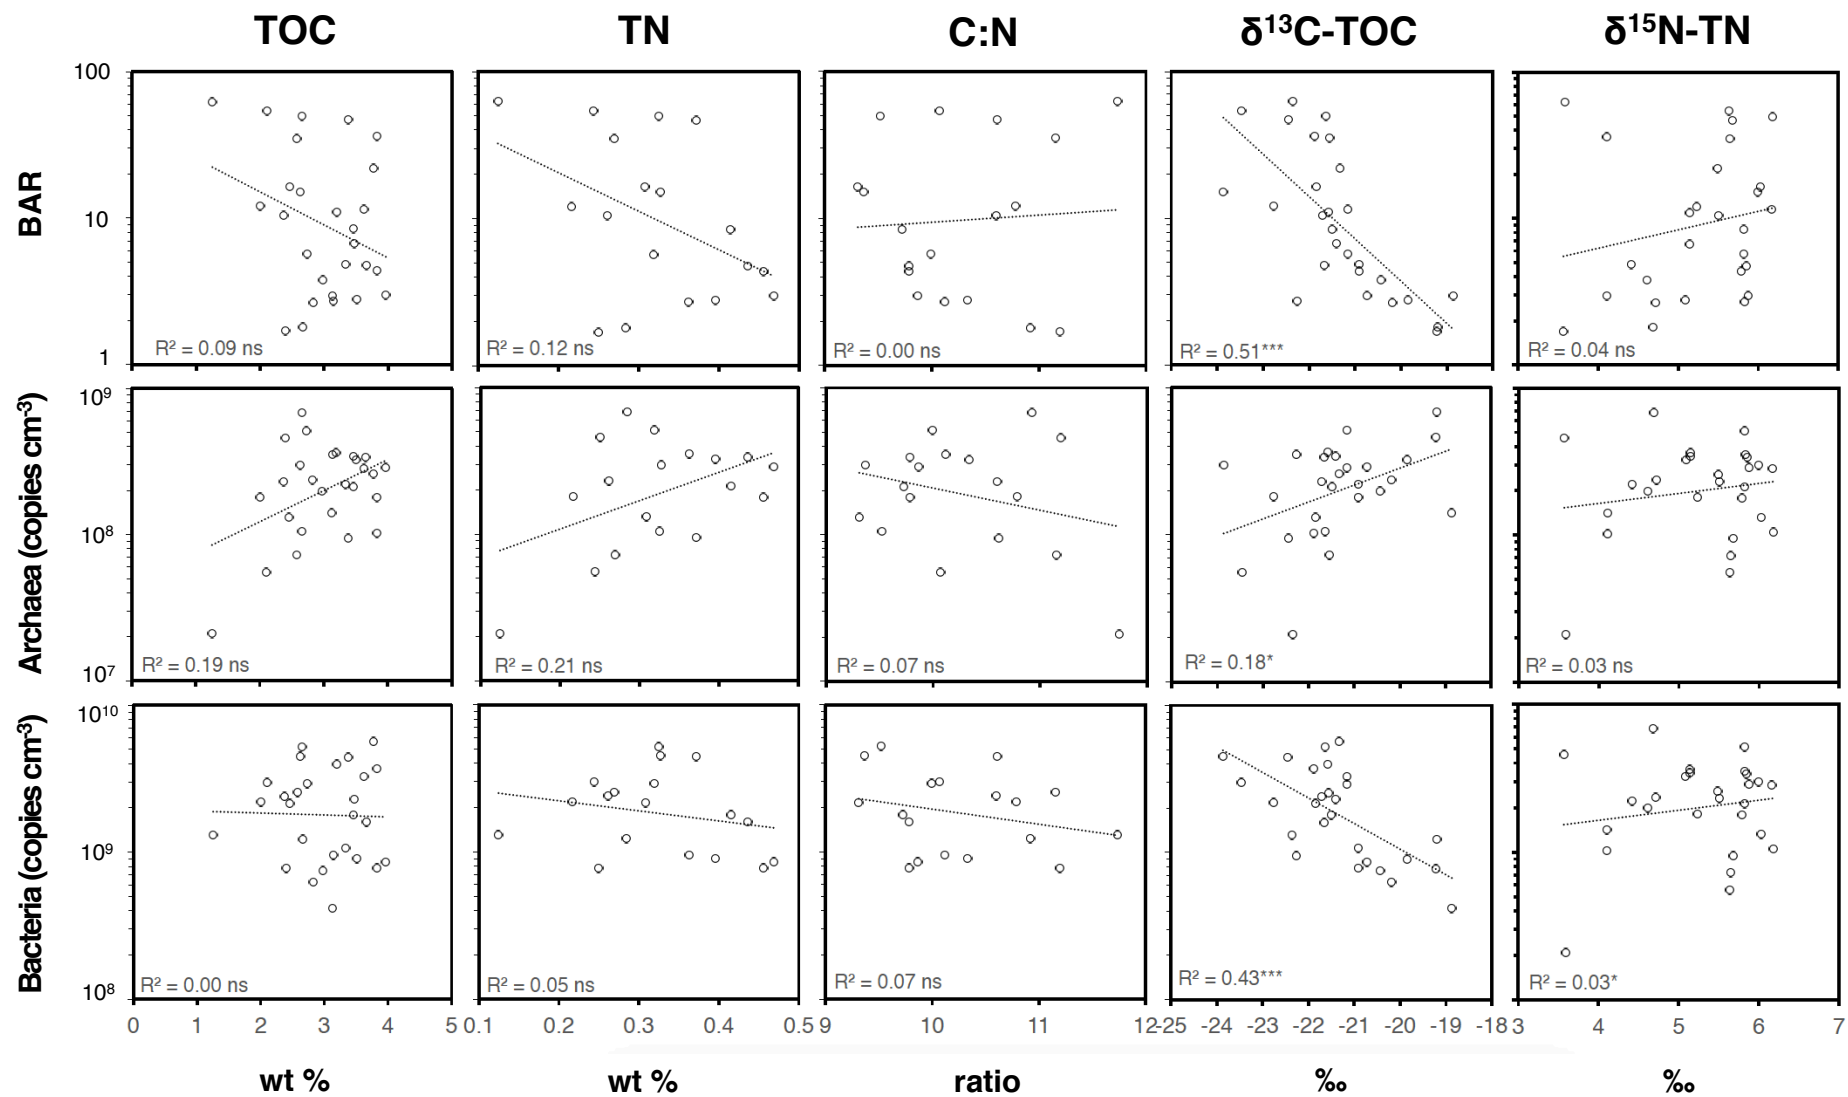

Supplementary Fig. 5b

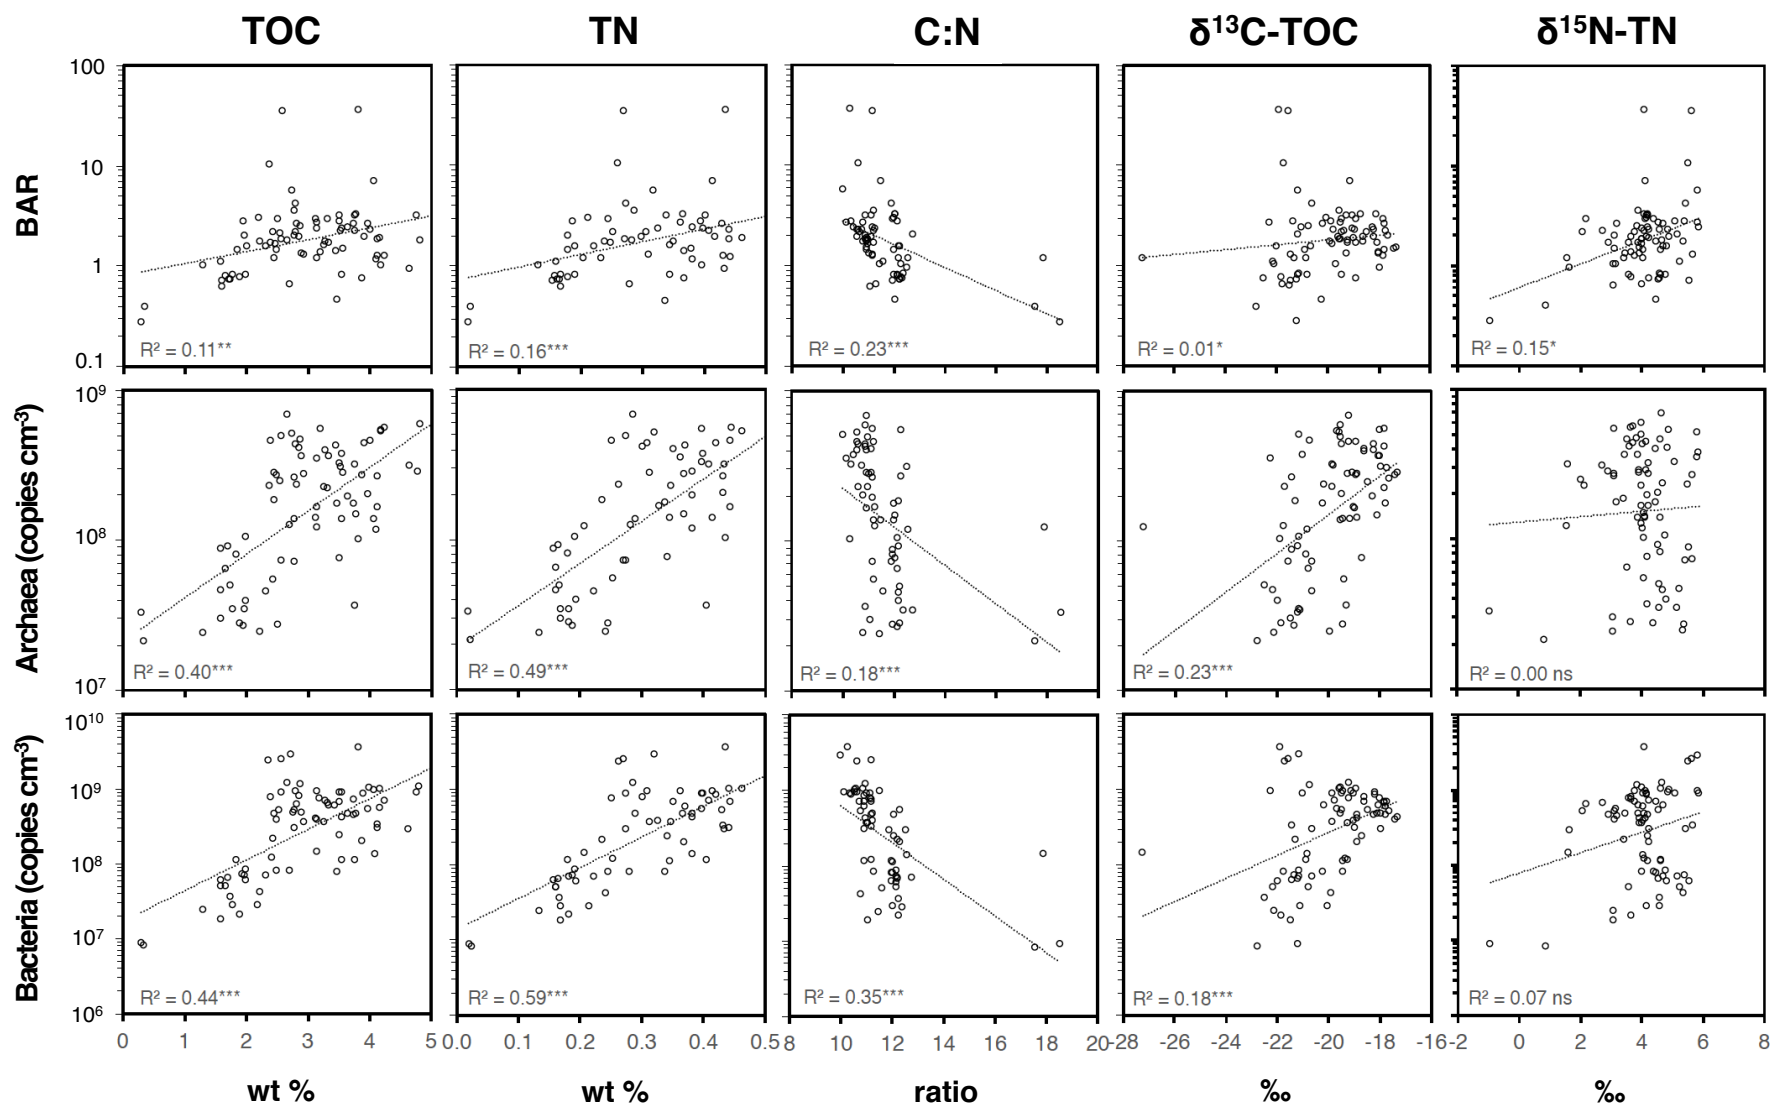

Supplementary Fig. 5c

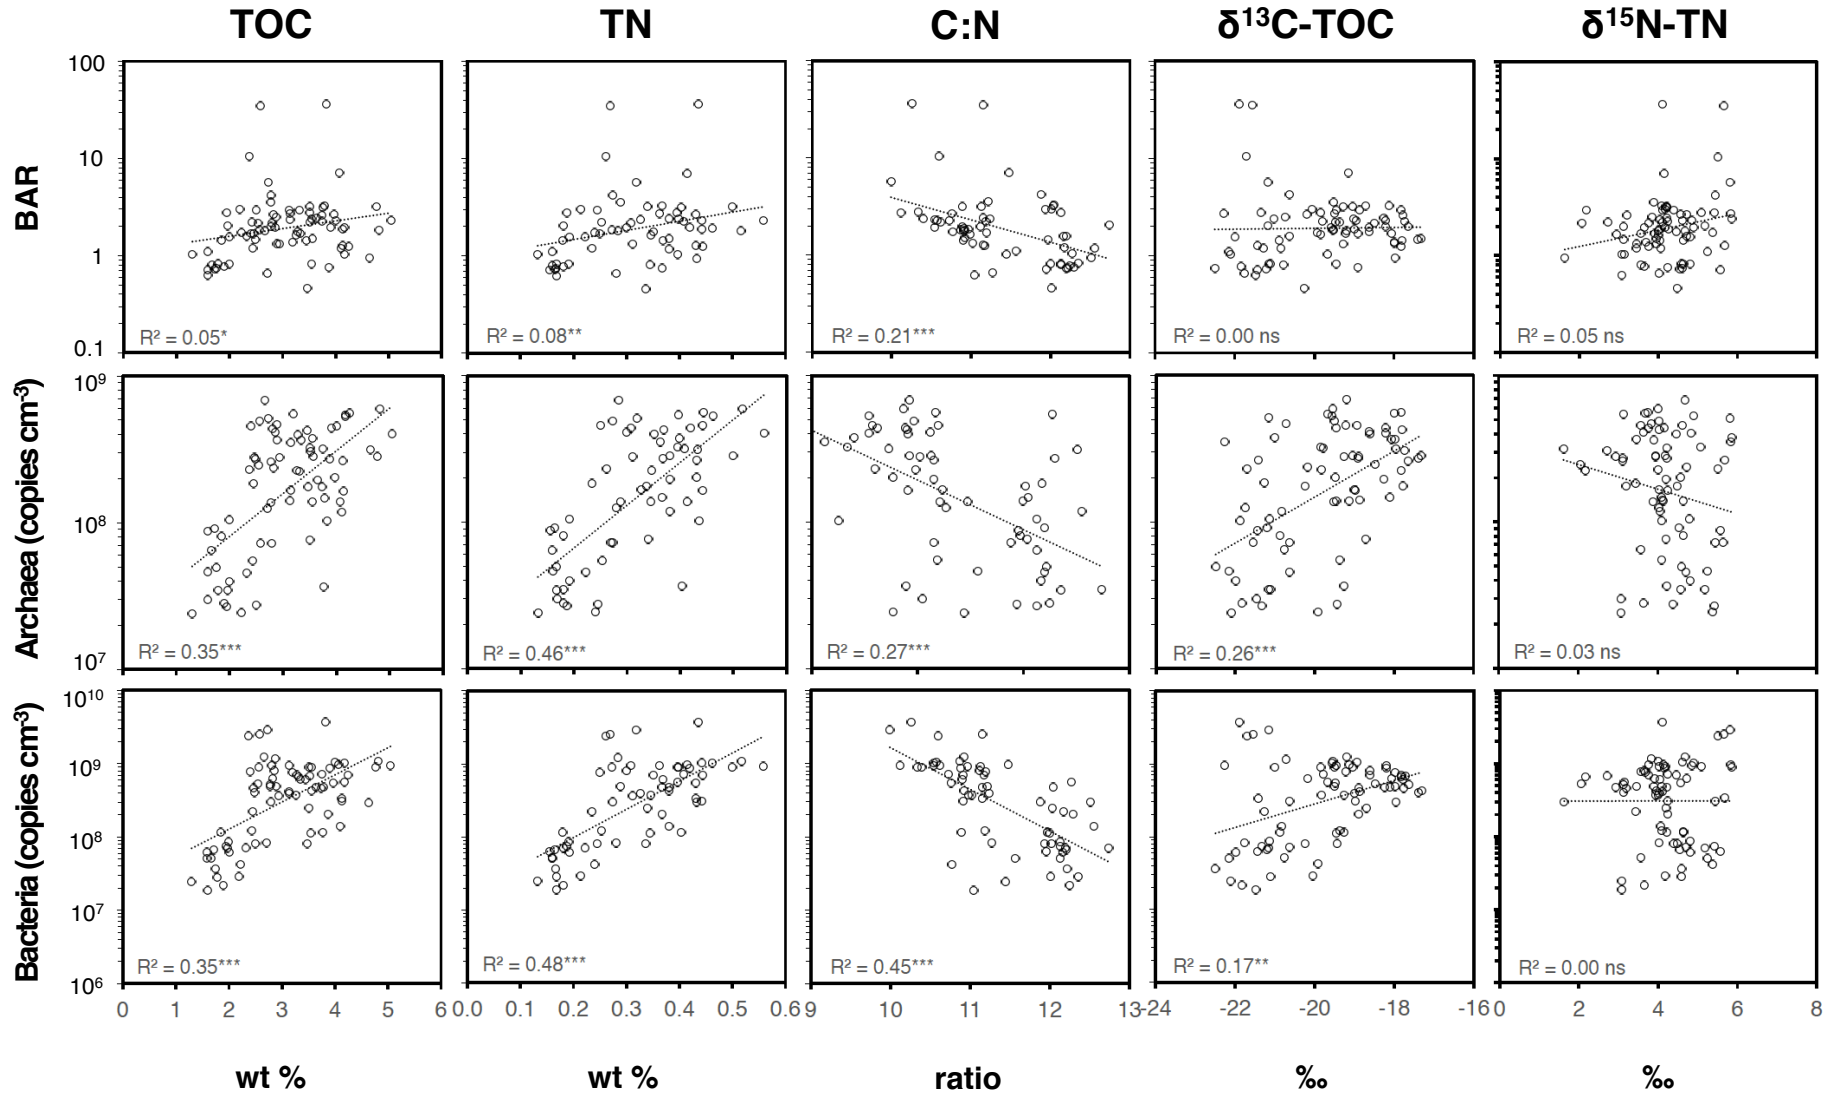

**Supplementary Figure 6: (a) Archaeal and (b) bacterial 16S gene abundances yielded by different primer pairs on three extraction replicates per depth at M1; (c) box plots of BARs.** (a, b) Three qPCR replicates were applied on each of the three extraction replicates and primer combinations. The average values for each extraction replicate and primer combination are plotted. (c) Box plots were based on BARs calculated from each of the bacterial and archaeal primer pair combinations (3 archaeal  $\times$  3 bacterial primer pairs, thus n=9). Blue lines inside boxes indicate average values, black lines indicate median values. Boxes indicate 25% and 75% confidence intervals. Error bars indicate 10 and 90% confidence intervals. The primer combinations Arc 806F-Arc 958R and Bac 8Fmod-Bac 338Rabc were used throughout this study.

# Supplementary Figure 6

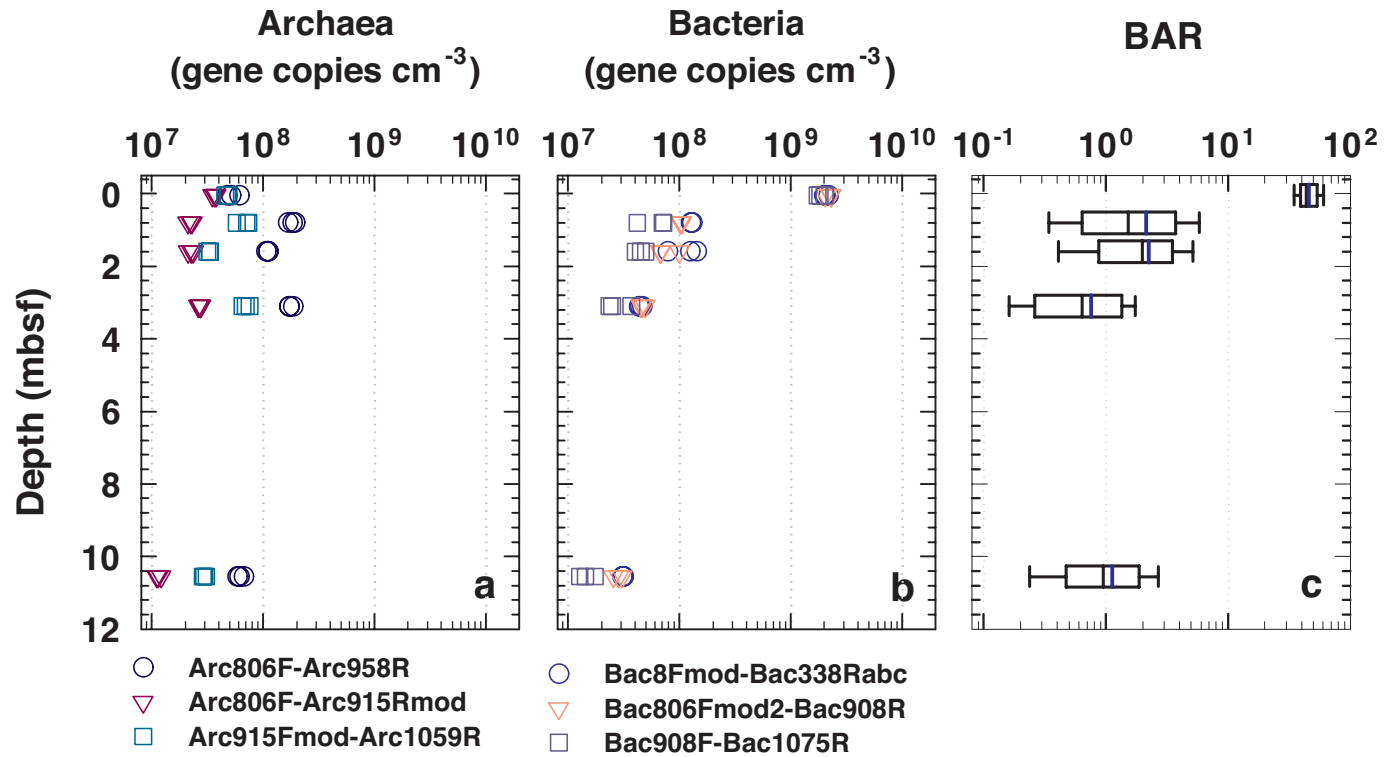

**Supplementary Figure 7: Cell abundance profiles at M22A, M27A, M29A, M1, and M5 determined by fluorescence microscopy.** The grey dashed line spanning across the lower panels indicates the minimum depth of sediment reworking. The grey shaded areas mark the SMTZ. Data from M1 and M5 were previously published<sup>28</sup>. Note: the SMTZ at M1 was ~0.5m deeper in the M1 core from May 2010 (see below) than in the M1 core from October 2009, which was used for DNA extractions (Supplementary Table 1 and Supplementary Figure 2).



Supplementary Figure 7

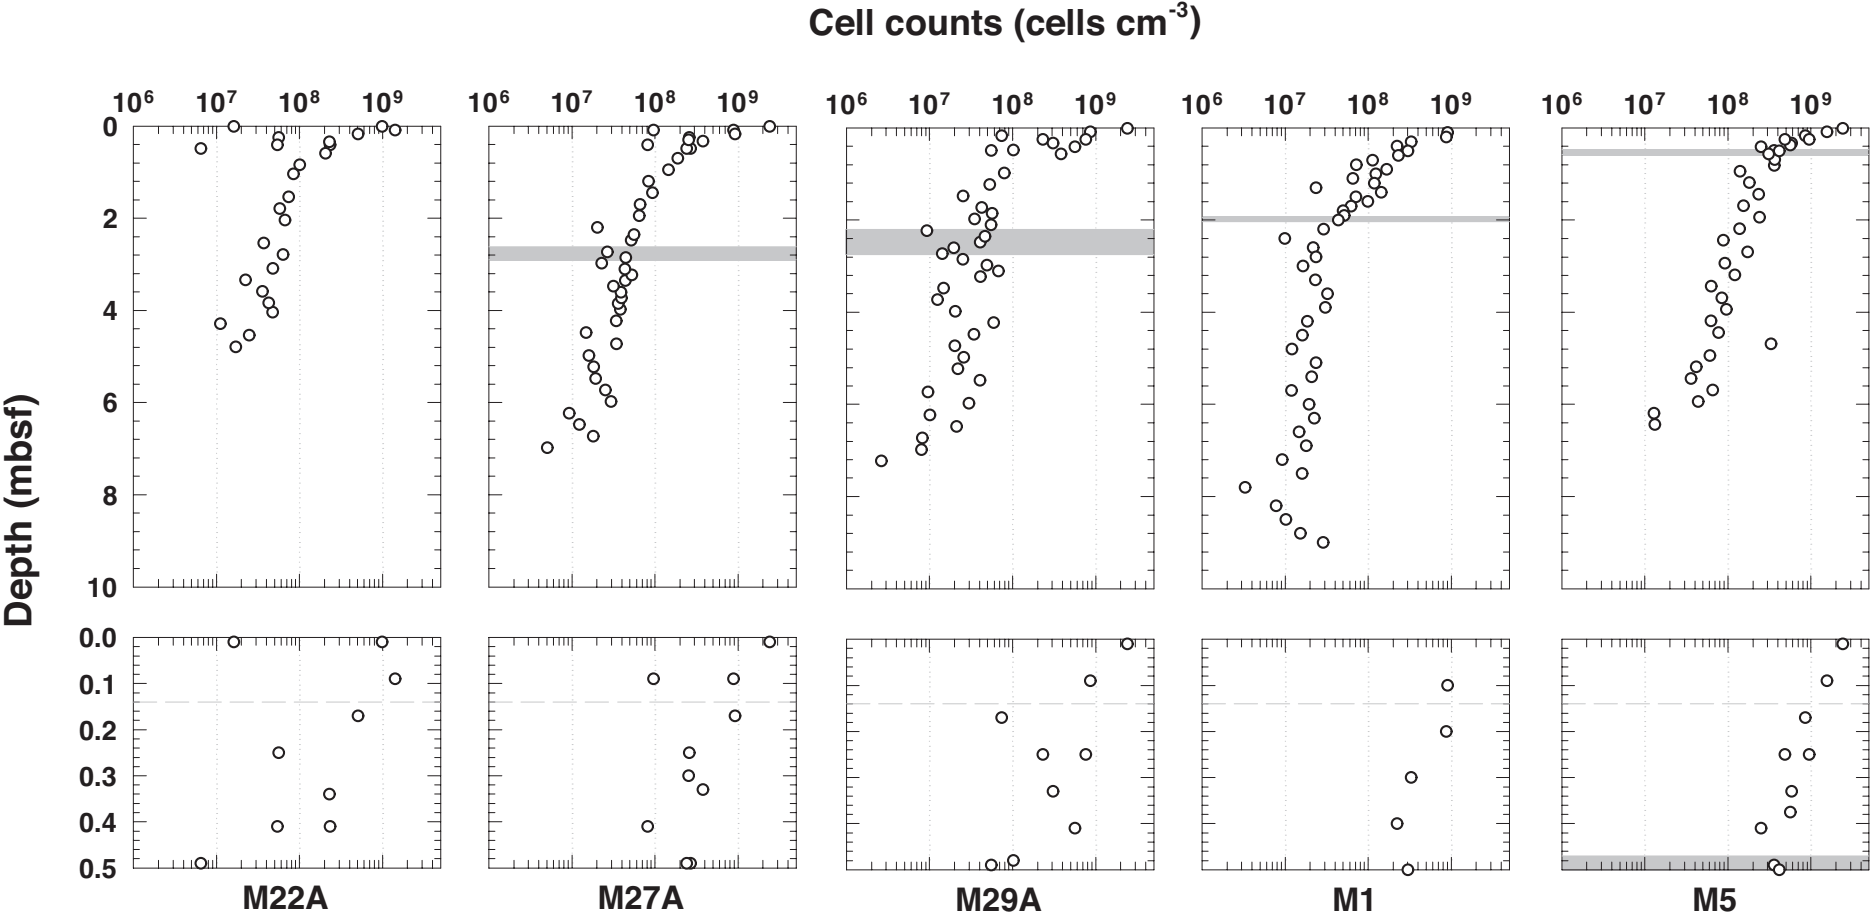

**Supplementary Figure 8: Cell abundances and 16S gene copy numbers per cell in Aarhus Bay.** (a) Depth distribution of cell abundances at M22A, M27A, M29A, M1, and M5 compiled from Supplementary Fig. 7. Cell abundances from M1 and M5 were previously published<sup>28</sup>. The grey solid line is the regression line ( $\text{Log cell abundance} = 8.05 - 0.68 \text{ Log depth}$ ) and the grey dashed lines indicate the 95% lower and upper prediction limits based on prokaryotic cell abundances in subsurface sediments at 106 locations<sup>29</sup>. (b) Depth distributions of 16S gene copy numbers per cell at M22A, M27A, M29A, and M5. The mean copy numbers per cell (averages $\pm$ standard) at individual stations are: M22A,  $4.3\pm 4.2$ ; M27,  $2.2\pm 1.4$ ; M29A,  $4.2\pm 2.5$ ; M5,  $2.0\pm 1.4$  copies cell<sup>-1</sup>. Cell counts and 16S rRNA gene copy numbers were obtained from the same cores (M22A, M27A, M29A), or from parallel cores taken on the same sampling date (M5). We omit data from M1, where cell counts and gene copy numbers were obtained from cores collected on different dates (cell counts: May 2010; DNA: October 2009) and differed clearly in sulfate concentration profiles and the depth of the SMTZ (Supplementary Table 1).

Supplementary Figure 8

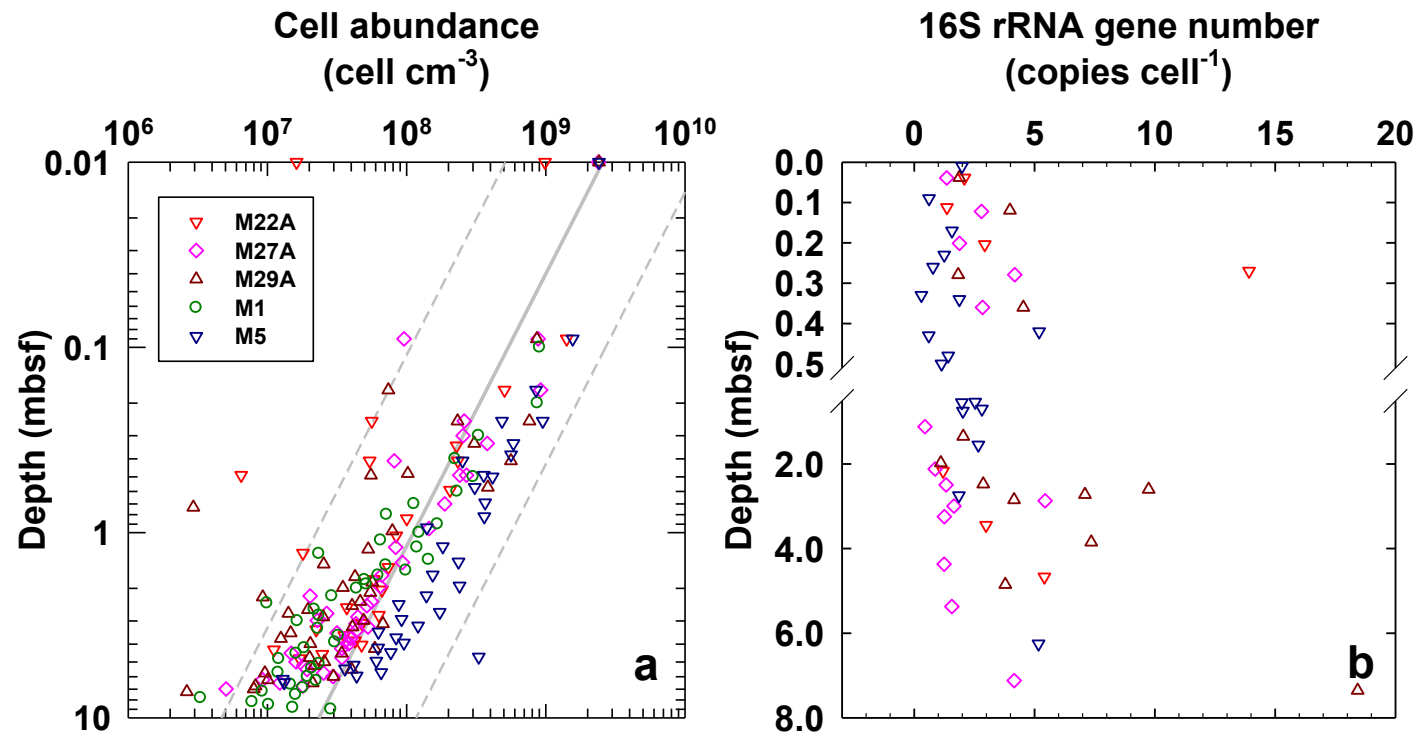

**Supplementary Figure 9: UPGMA trees (OTU level) for archaeal and bacterial communities among five depths at M1.** The UPGMA tree for Archaea was calculated from the archaeal community compositions generated by archaeal primer pairs (A1: Arc806F - Arc958R, A2: Arc806F - Arc915Rmod; A3: Arc915Fmod - Arc1059R). The UPGMA tree for Bacteria was calculated from the bacterial community compositions generated by bacterial primer pairs (B1: Bac8F - Bac338Rabc, B2: Bac806F\_mod2 - Bac908R; B3: Bac908F - Bac1075R). Algorithm: Paired group; similarity measurement: Bray-Curtis; number of bootstraps: 1,000. The depths represent the following zones: 5 cmbsf: bioturbation zone, 80 cmbsf: sulfate zone, 160 cmbsf: SMTZ, 310 cmbsf: shallow methane zone, 1055 cmbsf: freshwater peat layer in deep methane zone.

# Supplementary Figure 9

## Archaea

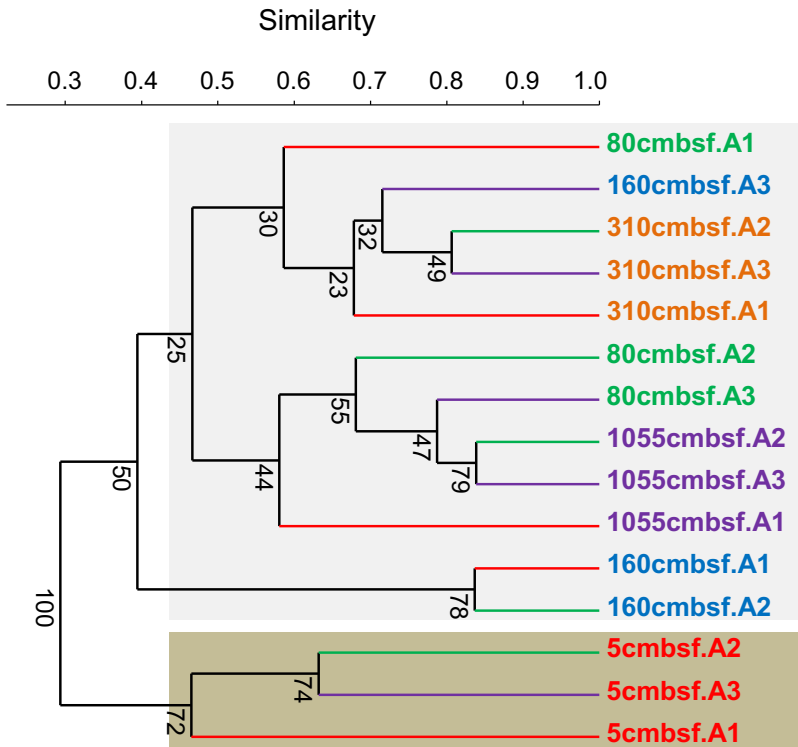

## Bacteria

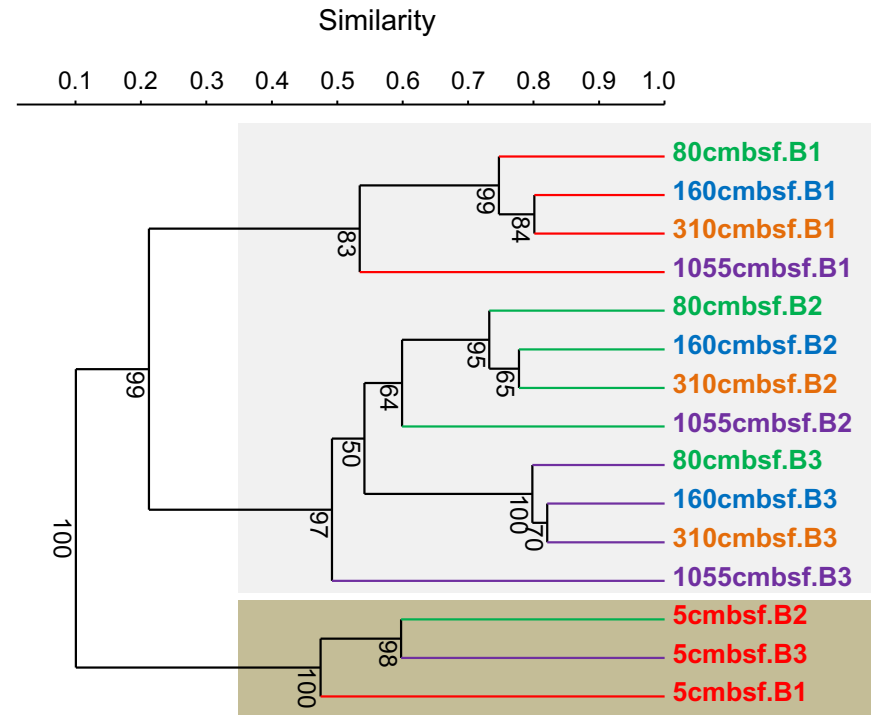

## Supplementary References

1. Holmkvist, L., Ferdelman, T. G. & Jørgensen, B. B. A cryptic sulfur cycle driven by iron in the methane zone of marine sediment (Aarhus Bay, Denmark). *Geochim. Cosmochim. Acta* **75**, 3581-3599 (2011).
2. Leloup, J., *et al.* Sulfate-reducing bacteria in marine sediment (Aarhus Bay, Denmark): Abundance and diversity related to geochemical zonation. *Environ. Microbiol.* **11**, 1278-1291 (2009).
3. Cadillo-Quiroz, H., *et al.* Vertical profiles of methanogenesis and methanogens in two contrasting acidic peatlands in central New York State, USA. *Environ. Microbiol.* **8**, 1428-1440 (2006).
4. Yu, Y., Lee, C., Kim, J. & Hwang, S. Group-specific primer and probe sets to detect methanogenic communities using quantitative real-time polymerase chain reaction. *Biotechnol. Bioeng.* **89**, 670-679 (2005).
5. Nadkarni, M., Martin, F. E., Jacques, N. & Hunter, N. Determination of bacterial load by real-time PCR using a broad-range (universal) probe and primers set. *Microbiology* **148**, 257-266 (2002).
6. Lever, M. A. , Torti, A., Eickenbusch, P., Michaud, A. B., Šantl-Temkiv, T. & Jørgensen, B. B. A modular method for the extraction of DNA and RNA, and the separation of DNA pools from diverse environmental sample types. *Front. Microbiol.* **6**, (2015).
7. Ohkuma, M. & Kudo, T. Phylogenetic analysis of the symbiotic intestinal microflora of the termite *Cryptotermes domesticus*. *FEMS Microbiol. Lett.* **164**, 389-395 (1998).
8. Schloss, P. D., *et al.* Introducing mothur: open-source, platform-independent, community-supported software for describing and comparing microbial communities. *Appl. Environ. Microbiol.* **75**, 7537-7541 (2009).
9. Bragg, L., Stone, G., Imelfort, M., Hugenholtz, P. & Tyson, G. W. Fast, accurate error-correction of amplicon pyrosequences using Acacia. *Nature Meth.* **9**, 425-426 (2012).
10. Edgar, R. C., Haas, B. J., Clemente, J. C., Quince, C. & Knight, R. UCHIME improves sensitivity and speed of chimera detection. *Bioinformatics* **27**, 2194-2200 (2011).

11. Hammer, Ø., Harper, D. A. T. & Ryan, P. D. Paleontological statistics software package for education and data analysis. *Palaeontol. Electron.* **4**, 9-18 (2001).
12. Maire, O., Duchene, J. C., Rosenberg, R., de Mendonca Jr., J.B. & Gremare, A. Effects of food availability on sediment reworking in *Abra ovata* and *A. nitida*. *Mar. Ecol. Prog. Ser.* **319**, 135-153 (2006).
13. Thayer, C. W. Sediment-mediated biological disturbance and the evolution of marine benthos. In: *Biotic Interactions in Recent and Fossil Benthic Communities* (eds Tevesz MJS). Plenum Press (1983).
14. Dauwe, B., Herman, P. M. J. & Heip, C. H. R. Community structure and bioturbation potential of macrofauna at four North Sea stations with contrasting food supply. *Mar. Ecol. Prog. Ser.* **173**, 67-83 (1998).
15. Fallesen, G. *The ecology of macrozoobenthos in Aarhus Bay, Denmark* PhD thesis, University of Stirling, (1994).
16. Josefson, A. B. & Rosenberg, R. Long-term soft-bottom faunal changes in three shallow fjords, West Sweden. *Neth. J. Sea. Res.* **22**, 149-159 (1988).
17. O'Foighil, D., McGrath, D., Conneely, M. E., Keegan, B. F. & Costelloe, M. Population dynamics and reproduction of *Mysella bidentata* (Bivalvia: Galeommatacea) in Galway Bay, Irish west coast. *Mar. Biol.* **81**, 283-291 (1984).
18. Kjørboe, T. & Møhlenberg, F. Particle selection in suspension-feeding bivalves. *Mar. Ecol. Prog. Ser.* **5**, 291-296 (1981).
19. Yonge, C. M. On the habits and adaptations of *Aloidis (Corbula) gibba*. *J. Mar. Biol. Assoc. U.K.* **26**, 358-376 (1946).
20. Richman, S. E. & Lovvorn, J. R. Effects of clam species dominance on nutrient and energy acquisition by spectacled eiders in the Bering Sea. *Mar. Ecol. Prog. Ser.* **261**, 283-297 (2003).
21. Gogina, M. & Zettler, M. L. Diversity and distribution of benthic macrofauna in the Baltic Sea. *J. Sea Res.* **64**, 313-321 (2010).
22. Clark, R. B. Observations on the food of *Nephtys*. *Limnol. Oceanogr.* **7**, 380-385 (1962).

23. Michaud, E., Aller, R. C. & Stora, G. Sedimentary organic matter distributions, burrowing activity, and biogeochemical cycling: Natural patterns and experimental artifacts. *Estuar. Coast. Shelf Sci.* **90**, 21-34 (2010).
24. Pedersen, T. F. & Munkegade, N. Metabolic adaptations to hypoxia of two species of Polychaeta, *Nephtys ciliata* and *Nephtys hombergii*. *Mar. Biol.* **161**, 213-215 (1991).
25. Dobbs, F. & Scholly, T. Sediment processing and selective feeding by *Pectinaria koreni* (Polychaeta: Pectinariidae) *Mar. Ecol. Prog. Ser.* **29**, 165-176 (1986).
26. Buchanan, J. B. The biology of *Echinocardium cordatum* [Echinodermata: Spatangoidea] from different habitats. *J. Mar. Biol. Assoc. U.K.* **46**, 97-114 (1966).
27. Jensen, J. B. & Bennike, O. Geological setting as background for methane distribution in Holocene mud deposits, Aarhus Bay, Denmark. *Cont. Shelf Res.* **29**, 775-784 (2009).
28. Langerhuus, A. T., *et al.* Endospore abundance and d:l-amino acid modeling of bacterial turnover in holocene marine sediment (Aarhus Bay). *Geochim. Cosmochim. Acta* **99**, 87-99 (2012).
29. Parkes, R. J., *et al.* A review of prokaryotic populations and processes in sub-seafloor sediments, including biosphere: Geosphere interactions. *Mar. Geol.* **352**, 409-425 (2014).
